# Supplementary material
Source: HighWire-hosted journal article supplement (https://jnnp.bmj.com/content/jnnp-2022-329395)
Supplement: inline-supplementary-material-1 [file inline-supplementary-material-1.pdf]

1  
2  
3  
4  
5  
6  
7  
8  
9  
10  
11  
12  
13  
14  
15  
16  
17  
18  
19  
20  
21  
22  
23  
24  
25  
26  
27  
28  
29  
30  
31  
32  
33  
34  
35  
36  
37  
38  
39  
40  
41  
42  
43  
44  
45  
46  
47  
48  
49  
50  
51  
52  
53  
54  
55  
56

## Supplemental Material

# SARS-CoV-2 mRNA vaccinations fail to elicit humoral and cellular immune responses in multiple sclerosis patients receiving fingolimod

Lil Meyer-Arndt<sup>1, 2, 3</sup>, Julian Braun<sup>1, 4, \*</sup>, Florent Fauchere<sup>1, 4, \*</sup>, Kanika Vanshylla<sup>5, \*</sup>, Lucie Loyal<sup>1, 4</sup>, Larissa Henze<sup>1, 4</sup>, Beate Kruse<sup>1, 4</sup>, Manuela Dingeldey<sup>1, 4</sup>, Karsten Jürchott<sup>1, 4</sup>, Maïke Mangold<sup>1</sup>, Ardit Maraj<sup>1</sup>, Andre Braginets<sup>1</sup>, Chotima Böttcher<sup>6</sup>, Andreas Nitsche<sup>7</sup>, Kathrin de la Rosa<sup>8</sup>, Christoph Ratswohl<sup>8</sup>, Birgit Sawitzki<sup>9</sup>, Pavlo Holenya<sup>10</sup>, Ulf Reimer<sup>10</sup>, Leif E. Sander<sup>11</sup>, Florian Klein<sup>5, 12, 13</sup>, Friedemann Paul<sup>2, 14, \*</sup>, Judith Bellmann-Strobl<sup>2, 14, \*</sup>, Andreas Thiel<sup>1, 4, \*§</sup>, Claudia Giesecke-Thiel<sup>16, \*, §</sup>

<sup>1</sup> Charité - Universitätsmedizin Berlin, corporate member of Freie Universität Berlin, Humboldt-Universität zu Berlin, and Berlin Institute of Health, Regenerative Immunology and Aging, BIH Center for Regenerative Therapies, 13353 Berlin, Germany

<sup>2</sup> Charité – Universitätsmedizin Berlin, corporate member of Freie Universität Berlin, Humboldt-Universität zu Berlin, and Berlin Institute of Health, NeuroCure Clinical Research Center, 10117 Berlin, Germany

<sup>3</sup> Charité – Universitätsmedizin Berlin, corporate member of Freie Universität Berlin, Humboldt-Universität zu Berlin, and Berlin Institute of Health, Department of Neurology with Experimental Neurology, 10117 Berlin, Germany

<sup>4</sup> Si-M / “Der Simulierte Mensch” a science framework of Technische Universität Berlin and Charité - Universitätsmedizin Berlin, 10117 Berlin, Germany

<sup>5</sup> Institute of Virology, Faculty of Medicine and University Hospital Cologne, University of Cologne, 50931 Cologne, Germany

<sup>6</sup> Charité – Universitätsmedizin Berlin, corporate member of Freie Universität Berlin, Humboldt-Universität zu Berlin, and Berlin Institute of Health, Department of Neuropsychiatry and Laboratory of Molecular Psychiatry, 10117 Berlin, Germany

<sup>7</sup> Robert Koch Institute, 13353 Berlin, Germany

<sup>8</sup> Department of Cancer and Immunology, Max-Delbrück-Center for Molecular Medicine in the Helmholtz Association (MDC), 13125 Berlin, Germany

<sup>9</sup> Charité - Universitätsmedizin Berlin, corporate member of Freie Universität Berlin, Humboldt-Universität zu Berlin, and Berlin Institute of Health, Institute for Medical Immunology, 13353 Berlin, Germany

<sup>10</sup> JPT Peptide Technologies, 12489 Berlin, Germany

<sup>11</sup> Charité – Universitätsmedizin Berlin, corporate member of Freie Universität Berlin, Humboldt-Universität zu Berlin, and Berlin Institute of Health, Department of Infectious Diseases and Respiratory Medicine, 13353 Berlin, Germany

<sup>12</sup> German Center for Infection Research, Partner Site Bonn-Cologne, 50931 Cologne, Germany

<sup>13</sup> Center for Molecular Medicine Cologne (CMMC), University of Cologne, 50931 Cologne, Germany

<sup>14</sup> Charité – Universitätsmedizin Berlin, corporate member of Freie Universität Berlin, Humboldt-Universität zu Berlin, and Berlin Institute of Health, Experimental and Clinical Research Center, 13125 Berlin, Germany

<sup>15</sup> Max-Delbrück-Center for Molecular Medicine in the Helmholtz Association (MDC), 13125 Berlin, Germany

<sup>16</sup> Max Planck Institute for Molecular Genetics, 14195 Berlin, Germany

\* equal contribution

§Co-Corresponding authors:

Claudia Giesecke-Thiel. Address: Max Planck Institute for Molecular Genetics, Ihnestraße 63, 14195 Berlin, Germany. Phone: 030-8413-1544. Email address: [giesecke@molgen.mpg.de](mailto:giesecke@molgen.mpg.de).

Andreas Thiel. Address: Charité - Universitätsmedizin Berlin, BIH Center for Regenerative Therapies, 13353 Berlin, Germany. Phone: 030-450-539555. Email address: [andreas.thiel@charite.de](mailto:andreas.thiel@charite.de).

57  
58  
59

## Supplemental Methods

### 60 SARS-CoV-2 pseudovirus neutralization assay

61 SARS-CoV-2 pseudoviruses were generated by co-transfection of plasmids encoding HIV Tat, HIV Gag/Pol, HIV  
62 Rev, luciferase followed by an IRES and ZsGreen, and the SARS-CoV-2 spike protein (Wu01 spike, EPI\_ISL\_406716)  
63 into HEK 293T cells using FuGENE 6 Transfection Reagent (Promega). Virus culture supernatant was harvested at  
64 48 h and 72 h post transfection and stored at -80°C till use. Harvested virus was titrated by infecting 293T  
65 expressing ACE2<sup>42</sup> and after a 48-hour incubation at 37°C and 5% CO<sub>2</sub>, luciferase activity was determined after  
66 addition of luciferin/lysis buffer (10 mM MgCl<sub>2</sub>, 0.3 mM ATP, 0.5 mM Coenzyme A, 17 mM IGEFAL (all Sigma-  
67 Aldrich), and 1 mM D-Luciferin (GoldBio) in Tris-HCL) using the Tristar microplate reader (Berthold).  
68 Neutralization assays were performed as described before. Briefly, 3-fold serial dilutions of serum (1:10 starting  
69 dilution) were co-incubated with pseudovirus supernatants for 1 h at 37°C, following which 293T-ACE-2 cells  
70 were added. After 48 h at 37°C and 5% CO<sub>2</sub>, luciferase activity was determined using the luciferin/lysis buffer.  
71 Background relative light units (RLUs) of non-infected cells was subtracted and 50% inhibitory dilution (ID<sub>50</sub>) were  
72 calculated as the serum dilution resulting in a 50% reduction in RLU compared to the untreated virus control  
73 wells. ID<sub>50</sub> values were calculated by plotting a non-linear fit dose response curve in GraphPad Prism 7.0.

74

### 75 SARS-CoV-2 spike epitope-specific peptide microarray

76 Peptides were synthesized and immobilized on peptide microarray slides as described previously. In brief, the  
77 peptides were synthesized using SPOT synthesis, cleaved from the solid support and chemoselectively  
78 immobilized on functionalized glass slides. Each peptide was deposited on the microarray in triplicates. The  
79 peptide microarrays were incubated with human sera (applied dilution 1:200) in a 96-well microarray incubation  
80 chamber for one hour at 30°C, followed by incubation with 0.1 µg/mL fluorescently labelled anti human IgG  
81 detection antibody (Jackson ImmunoResearch). Washing steps were performed after each incubation step with  
82 0.1 % Tween-20 in 1x TBS. After the final incubation step the microarrays were washed and dried. Each  
83 microarray slide was scanned using a GenePix Scanner 4300 SL50 (Molecular Devices). Signal intensities were  
84 evaluated using GenePix Pro 7.0 analysis software (Molecular Devices). For each peptide, the MMC2 value of the  
85 three triplicates was calculated. The MMC2 value was equal to the mean value of all three instances on the  
86 microarray except when the coefficient of variation (CV) – standard-deviation divided by the mean value – was  
87 larger than 0.5. In this case the mean of the two values closest to each other (MC2) was assigned to MMC2.  
88 Further data analysis and generation of the heatmaps was performed using the statistical computing and  
89 graphics software R (Version 4.1.1, [www.r-project.org](http://www.r-project.org)).

90

### 91 Ex vivo T cell stimulations

92 In short, PBMC were stimulated with PepMix™ SARS-CoV-2 spike glycoprotein pool 1 (JPT) covering the N-  
93 terminal aa residues 1-643 (abbreviated to "S-I") and with PepMix™ SARS-CoV-2 spike glycoprotein pool 2  
94 covering the C-terminal part (aa residues 633-1273, abbreviated to "S-II") at a final concentration of 1 µg/ml per  
95 peptide, respectively. Stimulation controls were performed with equal concentrations of DMSO in PBS  
96 (unstimulated control) and 1 µg/ml per peptide of CEFX Ultra SuperStim pool (JPT) as positive control. All  
97 approaches contained 1 µg/ml purified anti-CD28 (clone CD28.2; BD Biosciences). Incubation was performed at  
98 37°C, 5% CO<sub>2</sub> for 16 h in the presence of 10 µg/ml brefeldin A (Sigma-Aldrich) during the last 14h. T cell  
99 stimulations were stopped by incubation in 20mM EDTA for 5 min.

100

### 101 B cell and T cell flow cytometry

102

103

104

105

106

For S-I- and S-II-specific T cell analysis, antibodies were used as described before: CD3-FITC (REA613, Miltenyi),  
CD4-VioGreen (REA623, Miltenyi), CD8-VioBlue (REA734, Miltenyi), CD38-APC (REA671, Miltenyi), HLA-DR-  
PerCpVio700 (REA805, Miltenyi). For B cell status analysis: CD8 Vioblue (REA734, Miltenyi), IgD BV510 (IA6-2,  
Biolegend), CD14 BV570 (M5E2, Biolegend), CD21 BV605 (1048, BD), CD3 FITC (REA613, Miltenyi), SLAMF7 PE  
(162.1, Biolegend), CD27 PE-Dazzle594 (O323, Biolegend), HLADR Percp-Vio770 (REA780, Miltenyi), CD20 PE-

107 Vio770 (REA780, Miltenyi), CD38 APC (REA572, Miltenyi), CD4 AlexaFluor700 (RPA-T4, Biolegend) and CD19 APC-  
108 Vio770 (REA675, Miltenyi). For intracellular staining of stimulated T cells, fixation and permeabilization were  
109 performed with eBioscience™ FoxP3 fixation and PermBuffer (Invitrogen) according to the manufacturer's  
110 protocol. Intracellular staining was carried out for 30 min in the dark at room temperature with 4-1BB-PE  
111 (REA765, Miltenyi) and CD40L-PeVio770 (REA238, Miltenyi).

112 Peripheral blood B and T cell subsets were quantified using the following staining: 50µl of blood were stained for  
113 20 minutes at room temperature in the presence of 1mg/ml Beriglobin (CSL Behring) and the following antibodies  
114 at their determined optimum titration: CD4-VioBlue (REA623, Miltenyi), CD3-VioGreen (REA641, Miltenyi), HLA-  
115 A2-FITC (REA517, Miltenyi), CCR7-PE (REA108, Miltenyi), CD8-PerCP (REA734, Miltenyi), CD31-PE-Vio770  
116 (REA730, Miltenyi), CD19-APC (REA675, Miltenyi), CD16-AF700 (REA423, Miltenyi), CD45RA-APC-Vio770  
117 (REA1047, Miltenyi). 500µl of cold Erythrocyte lysis buffer (Buffer EL, Quiagen) were added and incubated 30  
118 minutes on ice. 400µl of cold PBS, BSA, 2mM EDTA were then added.

119  
120  
121  
122  
123  
124  
125  
126  
127  
128  
129  
130  
131  
132  
133  
134  
135  
136  
137  
138  
139  
140  
141  
142  
143  
144  
145  
146  
147  
148  
149  
150  
151  
152  
153  
154  
155  
156

157  
158  
159

Supplemental Results

Supplemental Fig. 1

Supplemental Fig. 1

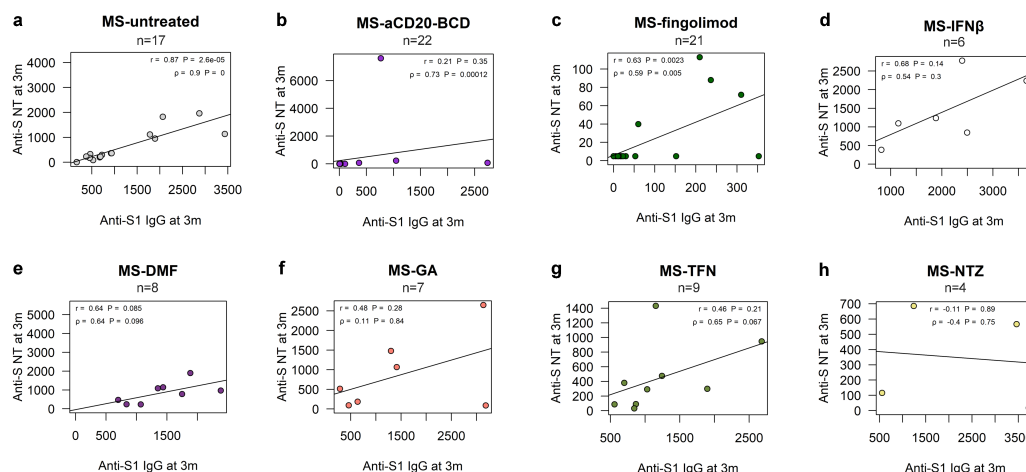

160  
161  
162  
163  
164  
165  
166  
167  
168  
169

**Supplemental Fig. 1. Association of anti-S1 IgG levels and neutralizing capacity.** Correlation of anti-S1 IgG and neutralizing capacity in serum at 3m for untreated MS patients (MS-untreated) (a), MS-aCD20-BCD (b), and MS-FTY720 (c), MS-IFNβ (d), MS-DMF (e), MS-GA (f), MS-TFN (g), and MS-NTZ (h). Simple linear regression tests performed per treatment; correlation coefficients depicted as lines and reported as r (for Pearson correlation) and rho (for Spearman rank correlation), respectively, with corresponding p-values: Spearman r value of 0.87 for untreated MS patients, 0.68 for IFNβ, 0.64 for DMF, 0.48 for GA, 0.46 for TFN, -0.11 for NTZ, 0.2 for aCD20-BCD, and 0.64 for fingolimod.

Supplemental Fig. 2

Supplemental Fig. 2

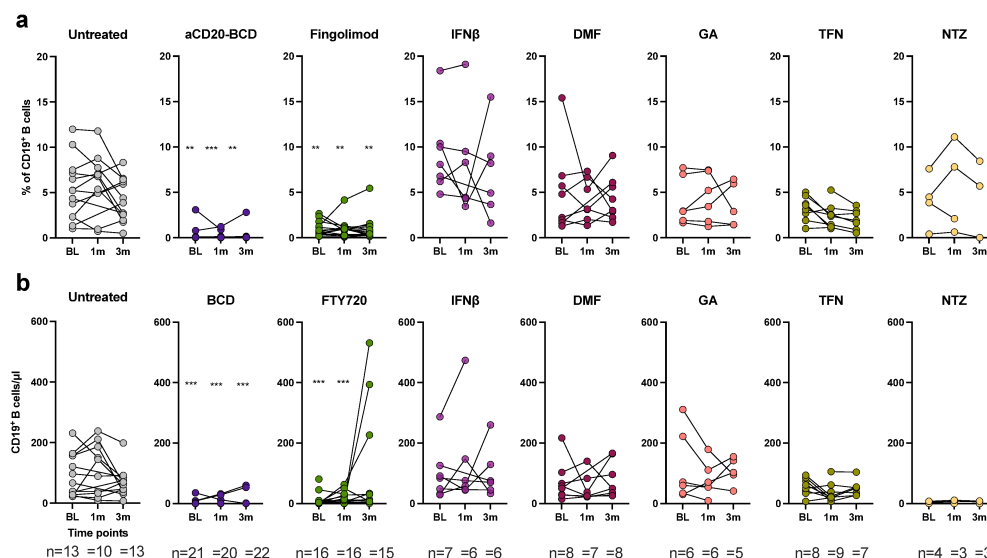

170  
171  
172  
173  
174  
175

**Supplemental Fig. 2. Total number and relative frequencies of peripheral blood CD19+ B cells.** a) Frequencies of CD19+ B cells in total lymphocytes and b) total number of CD19+ B cells per μl per treatment group. Kruskal-Wallis test followed by Dunn's multiple comparisons test performed to test between treatment groups at the respective time point were reported for comparison to untreated patients as: \*p ≤ 0.05, \*\*p ≤ 0.01, \*\*\*p ≤ 0.001, \*\*\*\*p ≤ 0.0001.

176

Supplemental Fig. 3

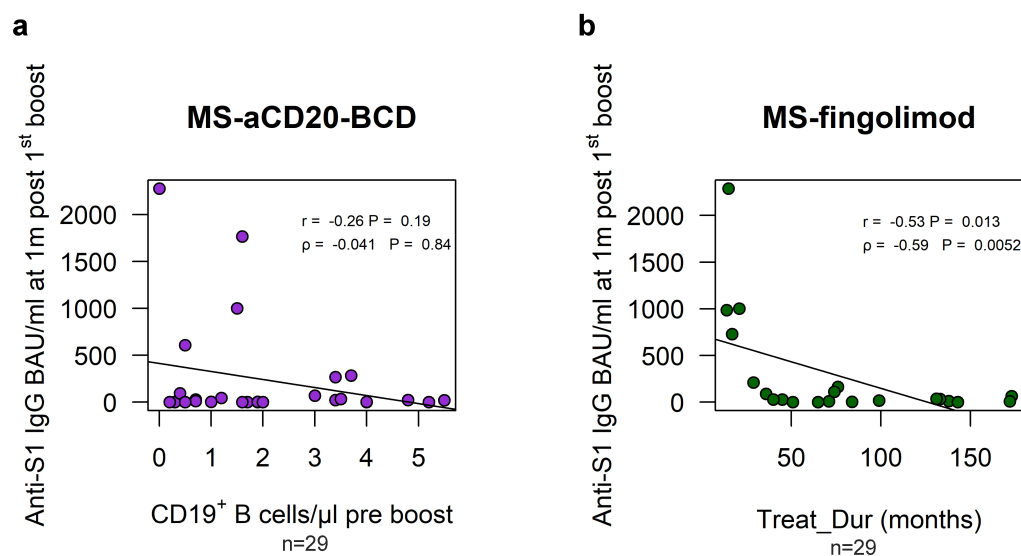

177

178

179 **Supplemental Fig. 3. Associations of anti-S1 IgG levels 1m post 1<sup>st</sup> boost for aCD20-BCD and fingolimod.**180 Correlation of anti-S1 IgG at 1m post 1<sup>st</sup> boost with CD19<sup>+</sup> B cells/μl pre boost (aCD20-BCD; **a**) and fingolimod181 treatment duration in months (**b**) respectively. Simple linear regression tests performed per treatment;182 correlation coefficients depicted as lines and reported as  $r$  (for Pearson correlation) and  $\rho$  (for Spearman rank183 correlation), respectively, with corresponding  $p$ -values.

184

185

186

187

188

189

190

191

192

193

194

195

196

197

198

199

200

201

202

203

204

205

206

207

208

209

210

211

212

213

214

215

## Supplemental Fig. 4

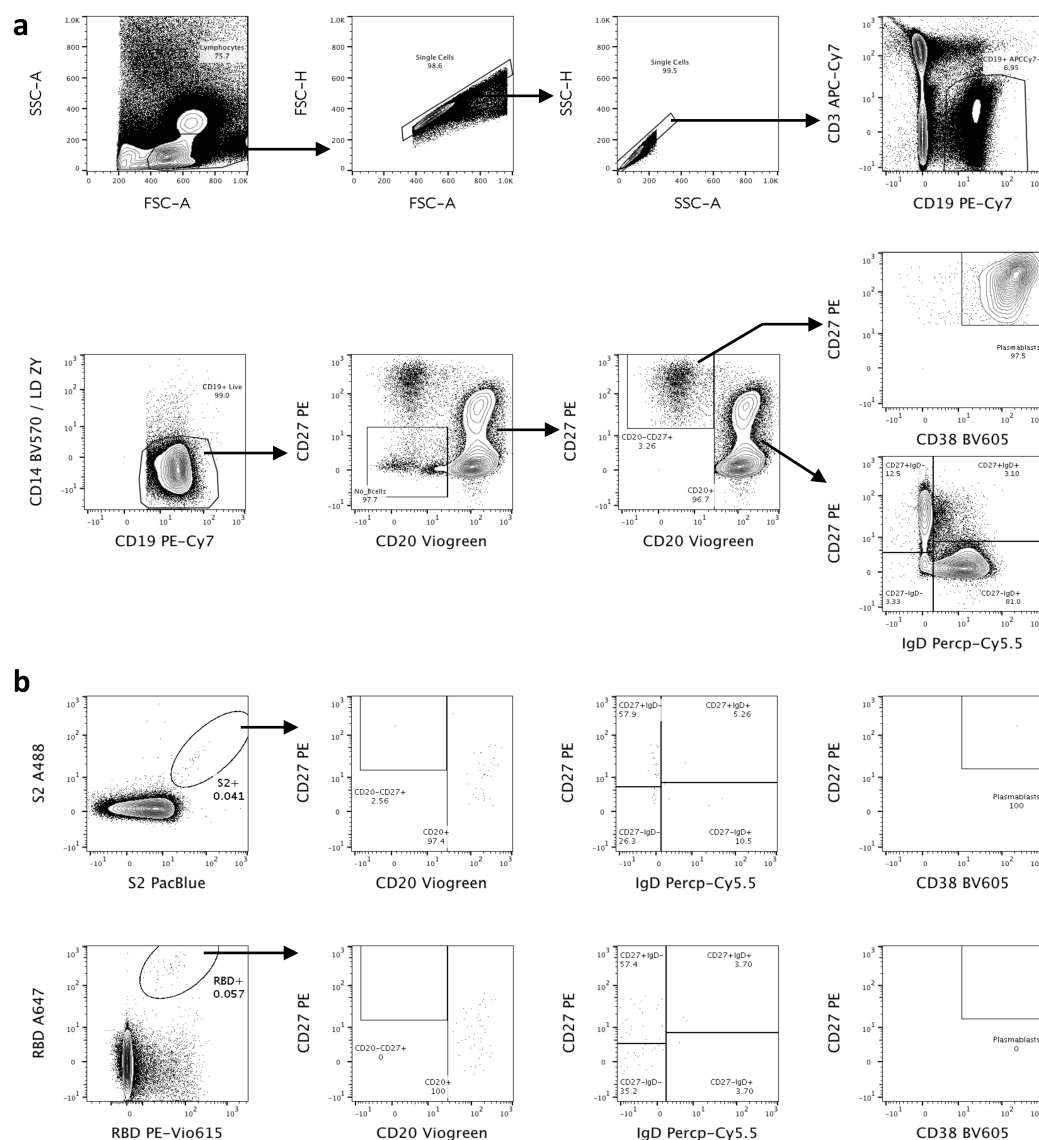

216  
217  
218  
219  
220  
221  
222  
223  
224  
225  
226  
227  
228  
229  
230  
231  
232

**Supplemental Fig. 4. Gating strategy of RBD- and S2-specific B cells.** **a**, B cells are gated from peripheral blood mononuclear cells (PBMCs; FSC-A vs SSC-A), by first excluding doublets (FSC-A vs FSC-H and SSC-A vs SSC-H), gating on CD19<sup>+</sup>CD3<sup>-</sup> B cells, excluding both dead cells (LiveDead Zombie Yellow) and CD14<sup>+</sup> cells, and finally by excluding CD20<sup>-</sup>CD27<sup>-</sup> cells. Among CD19<sup>+</sup>CD3<sup>-</sup> B cells, plasmablasts were identified as CD20<sup>-/low</sup>CD27<sup>++</sup>CD38<sup>++</sup> cells. CD20<sup>+</sup> B cells were further classified into subpopulations based on their CD27 and IgD expression. CD20<sup>+</sup>CD27<sup>+</sup>IgD<sup>-</sup> were classified as classical memory B cells (mBC), CD20<sup>+</sup>CD27<sup>+</sup>IgD<sup>+</sup> were classified as double positive mBC (dp mBC), CD20<sup>+</sup>CD27<sup>-</sup>IgD<sup>-</sup> were classified as double negative mBC (dn mBC), and CD20<sup>+</sup>CD27<sup>-</sup>IgD<sup>+</sup> were classified as naïve B cells (nB). **b**, exemplary contour plots showing gating of S2-specific B cells and RBD-specific B cells, and again their subsequent subpopulation classification based on their CD27 and IgD expression.

Supplemental Fig. 5

233  
234  
235  
236  
237  
238  
239  
240  
241  
242  
243  
244  
245  
246  
247  
248  
249  
250  
251  
252  
253  
254  
255  
256  
257  
258  
259  
260  
261  
262  
263  
264  
265  
266  
267  
268  
269  
270

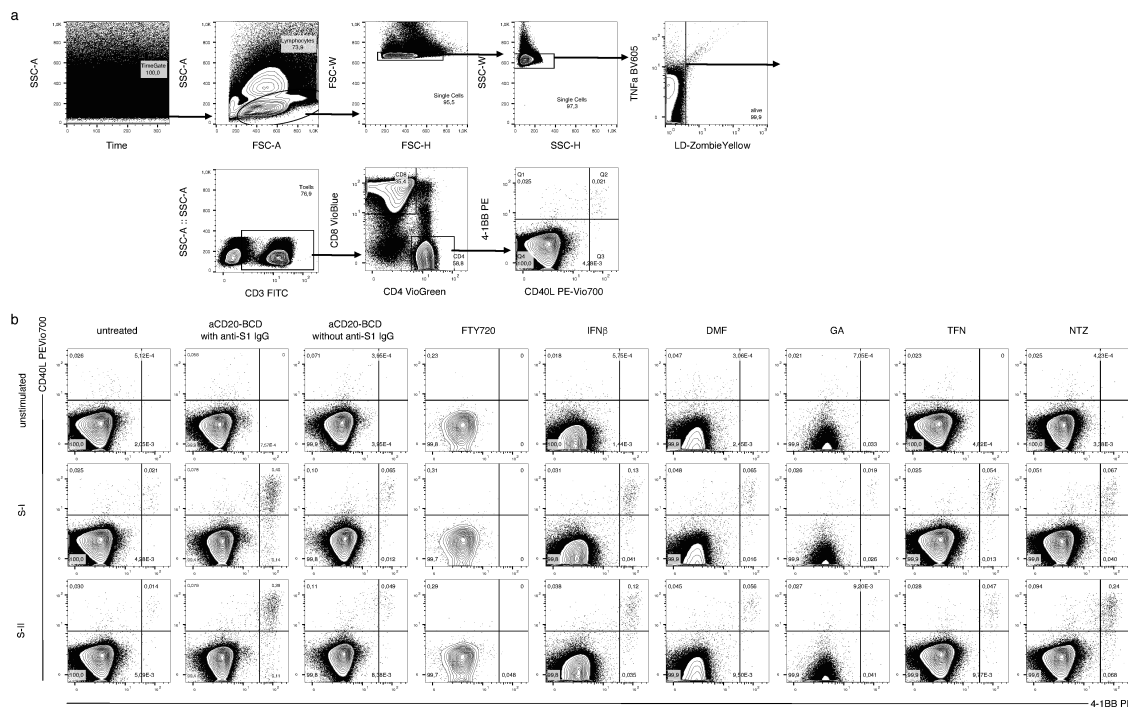

**Supplemental Fig. 5. Gating strategy of antigen-reactive CD4<sup>+</sup> T cells and differences between DMT treatment groups.** **a**, antigen-reactive CD40L<sup>+</sup>4-1BB<sup>+</sup>CD4<sup>+</sup> T cells were gated by controlling for measurement-dependent artefacts (Time vs SSC-a) from antigen-stimulated PBMC (FSC-A vs SSC-A), by first excluding doublets (FSC-H vs FSC-W and SSC-H vs SSC-W), dead cells (LiveDead Zombie Yellow), then gating on CD3<sup>+</sup> T cells and CD4<sup>+</sup> double positive cells. **b**, exemplary contour plots showing CD40L and 4-1BB expression in unstimulated control, S-I-, and S-II-stimulated CD4<sup>+</sup> T cells, displayed for the seven different DMT treatment groups at around two months after secondary SARS-CoV-2 mRNA vaccination.

Supplemental Table 1

| aCD20-BCD treatment | Days since last treatment before 1 <sup>st</sup> vaccination | CD19 <sup>+</sup> B cells per $\mu$ l before 1 <sup>st</sup> vaccination | Days since last treatment before booster | CD19 <sup>+</sup> B cells per $\mu$ l before booster |
|---------------------|--------------------------------------------------------------|--------------------------------------------------------------------------|------------------------------------------|------------------------------------------------------|
| Ocrelizumab         | 68                                                           | 0                                                                        | 65                                       | 0.5                                                  |
| Ocrelizumab         | 133                                                          | 0                                                                        | 87                                       | 0.3                                                  |
| Ocrelizumab         | 91                                                           | 0.1                                                                      | 125                                      | 1.9                                                  |
| Ocrelizumab         | 93                                                           | 0.3                                                                      | 143                                      | 5.5                                                  |
| Ocrelizumab         | 64                                                           | 0                                                                        | 105                                      | 1.7                                                  |
| Ocrelizumab         | 154                                                          | 35                                                                       |                                          |                                                      |
| Ocrelizumab         | 162                                                          | 9.2                                                                      | 96                                       | 3.7                                                  |
| Ocrelizumab         | 56                                                           | 0.1                                                                      | 100                                      | 1.2                                                  |
| Ocrelizumab         | 269                                                          | 8.2                                                                      |                                          |                                                      |
| Ocrelizumab         | 114                                                          | 0.1                                                                      | 360                                      | 3.4                                                  |
| Ocrelizumab         | 114                                                          | 0                                                                        | 102                                      | 1                                                    |
| Ocrelizumab         | 144                                                          | 0                                                                        | 116                                      | 4.8                                                  |
| Ocrelizumab         | 45                                                           | 0.2                                                                      | 58                                       | 1.9                                                  |
| Ocrelizumab         | 114                                                          | 2.5                                                                      |                                          |                                                      |
| Ocrelizumab         | 94                                                           | 0                                                                        | 84                                       | 5.2                                                  |

|             |     |     |     |       |
|-------------|-----|-----|-----|-------|
| Ocrelizumab | 92  | 0.1 |     |       |
| Ocrelizumab | 130 | 0   | 82  | 4     |
| Ocrelizumab | 97  | 0.7 | 120 | 0.7   |
| Rituximab   | 103 | 0.1 |     |       |
| Rituximab   | 120 | 0.1 | 103 | 3.5   |
| Rituximab   | 101 | 2.3 | 111 | 1.5   |
| Ocrelizumab | 112 |     | 179 | 1.6   |
| Ocrelizumab | 104 |     |     |       |
| Ocrelizumab | 117 |     | 149 | 3.4   |
| Ocrelizumab | 92  |     | 105 | 0.2   |
| Ocrelizumab | 77  |     | 99  | 0.7   |
| Ocrelizumab | 94  |     | 314 | 378.1 |
| Ocrelizumab |     |     | 83  | 4     |
| Ocrelizumab |     |     | 99  | 0.2   |
| Ocrelizumab |     |     | 129 | 0     |
| Ocrelizumab |     |     | 45  | 1.5   |
| Ocrelizumab |     |     | 68  | 2     |
| Ocrelizumab |     |     | 92  | 0.5   |
| Ocrelizumab |     |     | 93  | 3     |
| Ocrelizumab |     |     |     |       |
| Ocrelizumab |     |     | 94  | 1.6   |

271  
272  
273  
274  
275  
276  
277  
278  
279  
280  
281  
282

**Supplemental Table 1. Days since last aCD20-BCD treatment administration and absolute B cell numbers before primary and booster vaccinations.** 22 patients treated with aCD20-BCD therapies were enrolled prior to primary vaccination, another 5 after secondary vaccination (before 3m) and another 9 before booster vaccinations who received either rituximab or ocrelizumab (dosage per administration: 1000 mg rituximab or 600 mg ocrelizumab) in 6-month intervals (except for one patient whose next treatment interval was delayed due to low lymphocyte counts).
